# Supplementary material for: A Quantitative Multi-Scale Analysis for Revealing Site-Proximity Effects in Tandem Catalysis
Source: Research Square preprint supplement (doi:10.21203/rs.3.rs-8318066/v1), 2026-02-06

# Literature: Views tandem reactions as sequential reaction steps

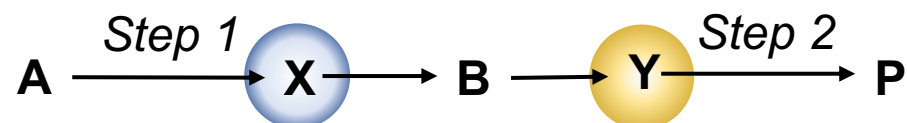

## Our work: Connects molecular nuances, reaction networks, transport processes, and process-scale performance

### 1. Molecular scale: Influences of different active sites on the individual reaction networks

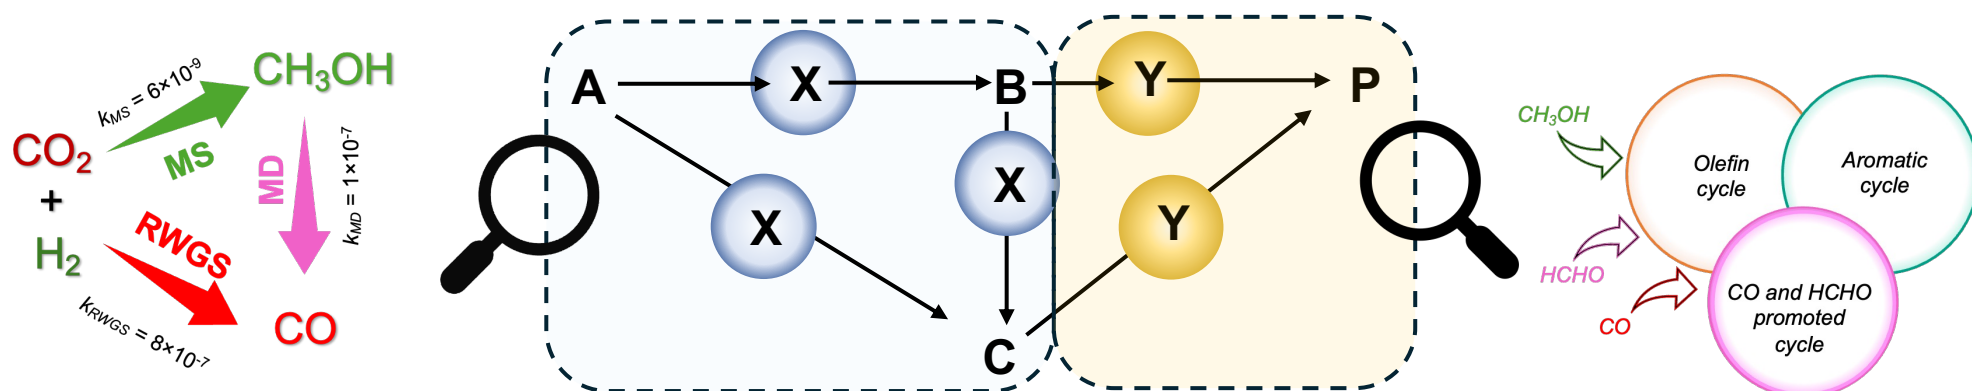

### 2. Reactor scale: Transport processes in each element govern the observed reaction rates

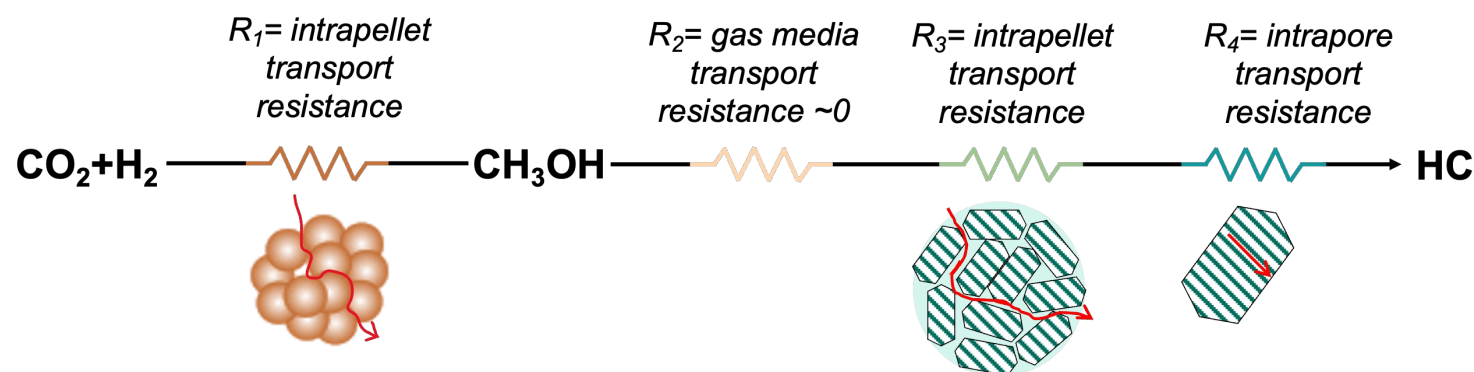

### 3. Process scale: Implications of transport governed rates and selectivity at plant scale

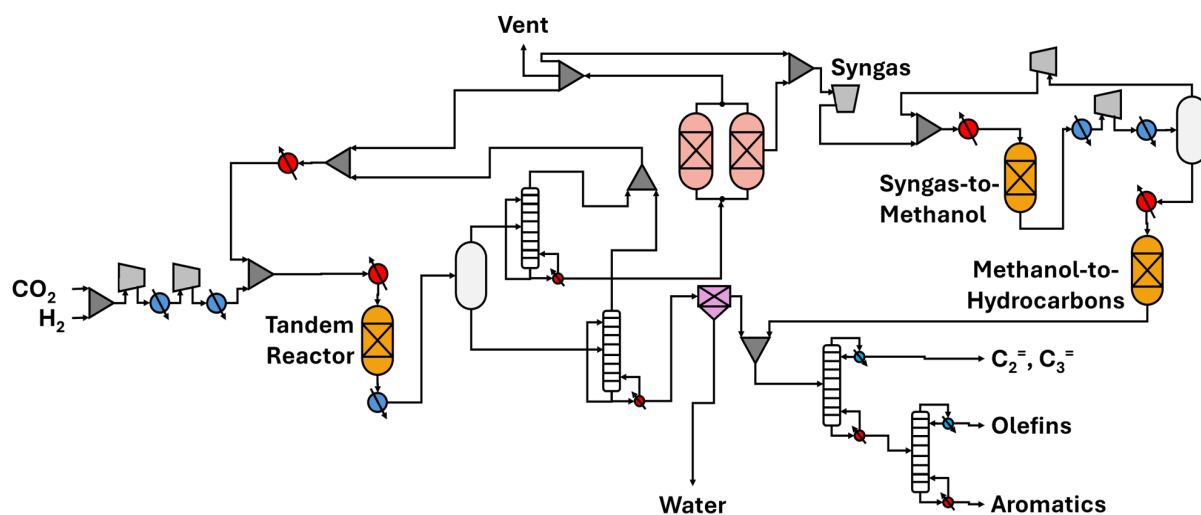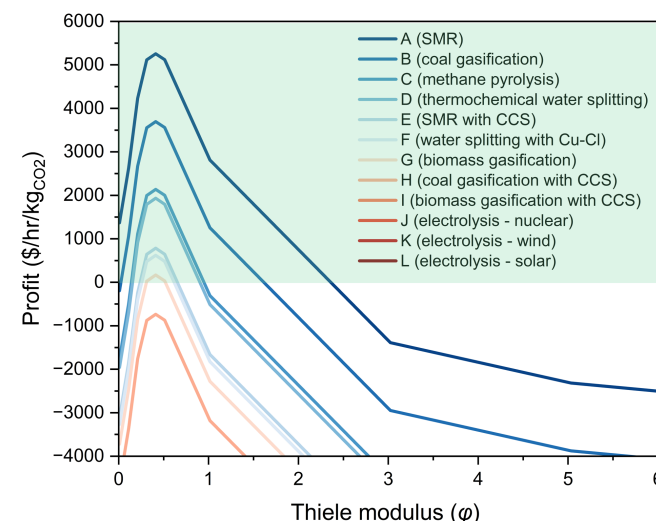

Supplement: Supplementary file 1 [file f2eeaef25d07fd7d23db2275.pdf]
